# Supplementary material for: Cluster randomized evaluation of the Nia Project: study protocol
Source: PubMed Central journal article supplement (PMC6310925; doi:10.1186/s12978-018-0586-4), 2018-12-29
Supplement: 12978_2018_586_MOESM1_ESM.pdf [file 12978_2018_586_MOESM1_ESM.pdf]

|                                                                                         |                                                                                                                                                                                                                                                                                                                                                                                                                                                                                                                                                                                                                                                                                                                                                                                                                                                                                                                                                                                                                                                                            |
|-----------------------------------------------------------------------------------------|----------------------------------------------------------------------------------------------------------------------------------------------------------------------------------------------------------------------------------------------------------------------------------------------------------------------------------------------------------------------------------------------------------------------------------------------------------------------------------------------------------------------------------------------------------------------------------------------------------------------------------------------------------------------------------------------------------------------------------------------------------------------------------------------------------------------------------------------------------------------------------------------------------------------------------------------------------------------------------------------------------------------------------------------------------------------------|
| <b>SCHOOL QUALITY SURVEY</b><br><br><b>Primary Education</b><br><br>School Year 20..... | <b>School Name:</b> .....<br><b>Address:</b> .....<br>School Year of Registration:.....<br>Registered with: MOEST <input type="checkbox"/> Other Ministry (Specify) <input type="checkbox"/> .....<br>Registration Number:  __ __  __ __  __ __  __ __  __ __  __ __ <br>TSC Code:  __ __  __ __  __ __  __ __  __ __ <br>KNEC Code:  __ __  __ __  __ __  __ __ <br>School Management Committee: Yes <input type="checkbox"/> No <input type="checkbox"/>                                                                                                                                                                                                                                                                                                                                                                                                                                                                                                                                                                                                                 |
|                                                                                         | County .....Sub-County.....<br>Zone .....<br>Constituency.....<br>Ward .....<br>Location: Rural <input type="checkbox"/> Urban <input type="checkbox"/><br>Does the school have a feeding program? Yes <input type="checkbox"/> No <input type="checkbox"/><br>WF Program: Yes <input type="checkbox"/> No <input type="checkbox"/><br>Feed the Children: Yes <input type="checkbox"/> No <input type="checkbox"/><br>School Program: Yes <input type="checkbox"/> No <input type="checkbox"/><br>School Status : Public <input type="checkbox"/> Private/Non-public <input type="checkbox"/><br>School Category : Ordinary <input type="checkbox"/> Integrated <input type="checkbox"/> Mobile <input type="checkbox"/> Special Needs <input type="checkbox"/><br>School Type : Boys <input type="checkbox"/> Girls <input type="checkbox"/> Mixed <input type="checkbox"/><br>Accommodation: Day <input type="checkbox"/> Boarding <input type="checkbox"/> Day & Boarding <input type="checkbox"/><br>For Day & Boarding, how many pupils board? Boys..... Girls: ..... |

|                                |              | <i>Primary</i> |                |                |                |                |                |                |                |              |
|--------------------------------|--------------|----------------|----------------|----------------|----------------|----------------|----------------|----------------|----------------|--------------|
|                                |              | <i>Class 1</i> | <i>Class 2</i> | <i>Class 3</i> | <i>Class 4</i> | <i>Class 5</i> | <i>Class 6</i> | <i>Class 7</i> | <i>Class 8</i> | <i>Total</i> |
| <i>Current year Enrollment</i> | <i>Boys</i>  |                |                |                |                |                |                |                |                |              |
|                                | <i>Girls</i> |                |                |                |                |                |                |                |                |              |
| <i>14 years &amp; above</i>    | <i>Boys</i>  |                |                |                |                |                |                |                |                |              |
|                                | <i>Girls</i> |                |                |                |                |                |                |                |                |              |
| <i>Repeaters</i>               | <i>Boys</i>  |                |                |                |                |                |                |                |                |              |
|                                | <i>Girls</i> |                |                |                |                |                |                |                |                |              |
| <i>Number of streams</i>       | <i>Total</i> |                |                |                |                |                |                |                |                |              |
| <i>Pupils with no desks</i>    | <i>Total</i> |                |                |                |                |                |                |                |                |              |
| <i>No. of Special Needs</i>    | <i>Total</i> |                |                |                |                |                |                |                |                |              |
| <i>No. of OVCs</i>             | <i>Total</i> |                |                |                |                |                |                |                |                |              |

### School Personnel

|       | Number of TSC Teachers by Qualification |              |                     |        |       | Number Of Teachers Employed by SMC/BOG/PTA | Number of non-Teaching |        |       | Labors       |
|-------|-----------------------------------------|--------------|---------------------|--------|-------|--------------------------------------------|------------------------|--------|-------|--------------|
|       | With university degree                  | With diploma | With P1 Certificate | Others | Total |                                            | With diploma and above | Others | Total | Total number |
| Male  |                                         |              |                     |        |       |                                            |                        |        |       |              |
| Femal |                                         |              |                     |        |       |                                            |                        |        |       |              |

### Exam Results, Textbooks, Facilities, School Feeding and Other Amenities

| Last Year KCPE Examination Details |  |      |       | Number Of Textbooks By Subject                     |       |         |             |         |                |
|------------------------------------|--|------|-------|----------------------------------------------------|-------|---------|-------------|---------|----------------|
|                                    |  | Boys | Girls |                                                    | Maths | English | Kiswahili   | Science | Social Studies |
| Number registered                  |  |      |       | Lower                                              |       |         |             |         |                |
| Mean score (100-500)               |  |      |       | Upper                                              |       |         |             |         |                |
| Pupils admitted to join            |  |      |       | <b>Number of class 7 pupils on school feeding:</b> |       |         |             |         |                |
|                                    |  |      |       | Boys _____                                         |       |         | Girls _____ |         |                |

|                                                                                                                                                                                         |                                                                                                                                                                                                                                                                                                |
|-----------------------------------------------------------------------------------------------------------------------------------------------------------------------------------------|------------------------------------------------------------------------------------------------------------------------------------------------------------------------------------------------------------------------------------------------------------------------------------------------|
| Is your school connected to electricity? Yes <input type="checkbox"/> No <input type="checkbox"/><br>If No, source of lighting: No light <input type="checkbox"/> Other: _____<br>..... | School's water source for drinking: Tap <input type="checkbox"/> River <input type="checkbox"/><br>Rain <input type="checkbox"/> Borehole <input type="checkbox"/> Water Truck/Bowser <input type="checkbox"/> None <input type="checkbox"/><br>Other <input type="checkbox"/> (SPECIFY) _____ |
|                                                                                                                                                                                         | School's water source for cleaning: Tap <input type="checkbox"/> River <input type="checkbox"/><br>Rain <input type="checkbox"/> Borehole <input type="checkbox"/> Water Truck/Bowser <input type="checkbox"/> None <input type="checkbox"/><br>Other <input type="checkbox"/> (SPECIFY) _____ |

| Type of Fees Paid by Parents/Guardians for Class 7 Directly to School | FIRST TERM 2016 Amount (Per Term) | SECOND TERM 2016 Amount (Per Term) | THIRD TERM 2016 Amount (Per Term) | FIRST TERM 2017 Amount (Per Term) |
|-----------------------------------------------------------------------|-----------------------------------|------------------------------------|-----------------------------------|-----------------------------------|
| Tuition/Extra Classes                                                 |                                   |                                    |                                   |                                   |
| Room and Board                                                        |                                   |                                    |                                   |                                   |
| Maintenance/Construction                                              |                                   |                                    |                                   |                                   |
| Examinations                                                          |                                   |                                    |                                   |                                   |
| Activity fee                                                          |                                   |                                    |                                   |                                   |
| School Meals                                                          |                                   |                                    |                                   |                                   |
| Transport                                                             |                                   |                                    |                                   |                                   |
| Other 1 (Specify)<br>_____                                            |                                   |                                    |                                   |                                   |
| <b>TOTAL</b>                                                          |                                   |                                    |                                   |                                   |

|          |                                                                                    | YES | NO | DK |
|----------|------------------------------------------------------------------------------------|-----|----|----|
| <b>A</b> | Did the school provide soap for handwashing for the students in the previous term? | 1   | 2  | 8  |
| <b>B</b> | Did the school provide sanitary pads for pupils in the previous school term?       | 1   | 2  | 8  |

|  |                                                                                                                                                                                                                                                                                                                                                                                                                                                                                               |
|--|-----------------------------------------------------------------------------------------------------------------------------------------------------------------------------------------------------------------------------------------------------------------------------------------------------------------------------------------------------------------------------------------------------------------------------------------------------------------------------------------------|
|  | (i) If YES, how often?      1 = Monthly, 2 = Twice, 3 = Only once                                                                                                                                                                                                                                                                                                                                                                                                                             |
|  | (ii) To whom were sanitary pads provided?      1 = All girls;    2 = Only the menstruating girls                                                                                                                                                                                                                                                                                                                                                                                              |
|  | (iii) To which classes were sanitary pads provided?<br>Class 3    Yes <input type="checkbox"/> No <input type="checkbox"/><br>Class 4    Yes <input type="checkbox"/> No <input type="checkbox"/><br>Class 5    Yes <input type="checkbox"/> No <input type="checkbox"/><br>Class 6    Yes <input type="checkbox"/> No <input type="checkbox"/><br>Class 7    Yes <input type="checkbox"/> No <input type="checkbox"/><br>Class 8    Yes <input type="checkbox"/> No <input type="checkbox"/> |
|  | (iv) If the sanitary pads were provided on an individual basis, please specify _____                                                                                                                                                                                                                                                                                                                                                                                                          |

Name of Head of the school: \_\_\_\_\_ CellPhone Number \_\_\_\_\_

Signature and Stamp: \_\_\_\_\_

**OBSERVATION**

**Section A: Rooms**

|                                                                                 |                                                               |                                                                                                      |                                                                                       |                                                   |                                                             |                                                                    |                                                                         |
|---------------------------------------------------------------------------------|---------------------------------------------------------------|------------------------------------------------------------------------------------------------------|---------------------------------------------------------------------------------------|---------------------------------------------------|-------------------------------------------------------------|--------------------------------------------------------------------|-------------------------------------------------------------------------|
| <b>A1</b>                                                                       | In total, how many classrooms does the school have? ..... [ ] |                                                                                                      |                                                                                       |                                                   |                                                             |                                                                    |                                                                         |
| <b>Instruction: visit each classroom on school site. For each room, record:</b> |                                                               |                                                                                                      |                                                                                       |                                                   |                                                             |                                                                    |                                                                         |
|                                                                                 |                                                               | <b>A2 Structure type</b><br>0 = Poles / pillars<br>1 = Damaged / partial walls<br>2 = Complete walls | <b>A3 Roof type</b><br>0 = No roof<br>1 = Damaged / partial roof<br>2 = Complete roof | <b>A4 Flooring type</b><br>0 = Dirt<br>1 = Cement | <b>A5 Blackboard</b><br>0 = No blackboard<br>1 = Blackboard | <b>A6 Teacher's desk / table</b><br>0 = Not present<br>1 = Present | <b>A7 Desks / chairs for students</b><br>0 = Not present<br>1 = present |
| <b>A</b>                                                                        |                                                               |                                                                                                      |                                                                                       |                                                   |                                                             |                                                                    |                                                                         |
| <b>B</b>                                                                        |                                                               |                                                                                                      |                                                                                       |                                                   |                                                             |                                                                    |                                                                         |
| <b>C</b>                                                                        |                                                               |                                                                                                      |                                                                                       |                                                   |                                                             |                                                                    |                                                                         |
| <b>D</b>                                                                        |                                                               |                                                                                                      |                                                                                       |                                                   |                                                             |                                                                    |                                                                         |
| <b>E</b>                                                                        |                                                               |                                                                                                      |                                                                                       |                                                   |                                                             |                                                                    |                                                                         |
| <b>F</b>                                                                        |                                                               |                                                                                                      |                                                                                       |                                                   |                                                             |                                                                    |                                                                         |
| <b>G</b>                                                                        |                                                               |                                                                                                      |                                                                                       |                                                   |                                                             |                                                                    |                                                                         |
| <b>H</b>                                                                        |                                                               |                                                                                                      |                                                                                       |                                                   |                                                             |                                                                    |                                                                         |
| <b>I</b>                                                                        |                                                               |                                                                                                      |                                                                                       |                                                   |                                                             |                                                                    |                                                                         |
| <b>J</b>                                                                        |                                                               |                                                                                                      |                                                                                       |                                                   |                                                             |                                                                    |                                                                         |
| <b>K</b>                                                                        |                                                               |                                                                                                      |                                                                                       |                                                   |                                                             |                                                                    |                                                                         |
| <b>L</b>                                                                        |                                                               |                                                                                                      |                                                                                       |                                                   |                                                             |                                                                    |                                                                         |
| <b>M</b>                                                                        |                                                               |                                                                                                      |                                                                                       |                                                   |                                                             |                                                                    |                                                                         |
| <b>N</b>                                                                        |                                                               |                                                                                                      |                                                                                       |                                                   |                                                             |                                                                    |                                                                         |
| <b>P</b>                                                                        |                                                               |                                                                                                      |                                                                                       |                                                   |                                                             |                                                                    |                                                                         |
| <b>Q</b>                                                                        |                                                               |                                                                                                      |                                                                                       |                                                   |                                                             |                                                                    |                                                                         |
| <b>R</b>                                                                        |                                                               |                                                                                                      |                                                                                       |                                                   |                                                             |                                                                    |                                                                         |
| <b>S</b>                                                                        |                                                               |                                                                                                      |                                                                                       |                                                   |                                                             |                                                                    |                                                                         |
| <b>T</b>                                                                        |                                                               |                                                                                                      |                                                                                       |                                                   |                                                             |                                                                    |                                                                         |
| <b>U</b>                                                                        |                                                               |                                                                                                      |                                                                                       |                                                   |                                                             |                                                                    |                                                                         |

|           |                                                                   |                                  |           |            |
|-----------|-------------------------------------------------------------------|----------------------------------|-----------|------------|
| <b>A8</b> | Does the school have the following dedicated rooms or facilities? | Library                          | <b>NO</b> | <b>YES</b> |
|           |                                                                   | Secure book/storage room         | 0         | 1          |
|           |                                                                   | Sports / other equipment storage | 0         | 1          |
|           |                                                                   | Staff room                       | 0         | 1          |
|           |                                                                   | Head teacher's office            | 0         | 1          |
|           |                                                                   |                                  |           |            |

**Section B: Toilet Facilities**

Indicate how many toilets the school has for use how many are for use exclusively by boys/exclusively girls/exclusively for staff/shared

| <b>Instruction: Record total number of toilets and whether they are functional or not</b> | Boys toilets | Girls toilets | Shared toilets | Staff toilets |
|-------------------------------------------------------------------------------------------|--------------|---------------|----------------|---------------|
| Functional                                                                                | [ ____ ]     | [ ____ ]      | [ ____ ]       | [ ____ ]      |
| Not Functional                                                                            | [ ____ ]     | [ ____ ]      | [ ____ ]       | [ ____ ]      |

| Select one functional toilet for each user type that represents the majority of toilets for that user, and indicate the door type, privacy, structure material and their functionality. |                       |          |          |          |          |
|-----------------------------------------------------------------------------------------------------------------------------------------------------------------------------------------|-----------------------|----------|----------|----------|----------|
|                                                                                                                                                                                         |                       | Toilet 1 | Toilet 2 | Toilet 3 | Toilet 4 |
| <b>A</b>                                                                                                                                                                                | Users:                |          |          |          |          |
|                                                                                                                                                                                         | Boys                  | 1        | 1        | 1        | 1        |
|                                                                                                                                                                                         | Girls                 | 2        | 2        | 2        | 2        |
|                                                                                                                                                                                         | Shared                | 3        | 3        | 3        | 3        |
|                                                                                                                                                                                         | Staff only            | 4        | 4        | 4        | 4        |
|                                                                                                                                                                                         | Other (Specify)       | _____    | _____    | _____    | _____    |
| <b>B</b>                                                                                                                                                                                | Door type:            |          |          |          |          |
|                                                                                                                                                                                         | Floor to ceiling door | 1        | 1        | 1        | 1        |
|                                                                                                                                                                                         | Partial door          | 2        | 2        | 2        | 2        |
|                                                                                                                                                                                         | Fabric/gunia/nylon    | 3        | 3        | 3        | 3        |
|                                                                                                                                                                                         | None                  | 4        | 4        | 4        | 4        |
|                                                                                                                                                                                         | Other (Specify)       | _____    | _____    | _____    | _____    |
| <b>C</b>                                                                                                                                                                                | Privacy (Latch/lock): |          |          |          |          |
|                                                                                                                                                                                         | Yes                   | 1        | 1        | 1        | 1        |
|                                                                                                                                                                                         | No                    | 2        | 2        | 2        | 2        |
| <b>D</b>                                                                                                                                                                                | Structure material:   |          |          |          |          |
|                                                                                                                                                                                         | Corrugated Iron       | 1        | 1        | 1        | 1        |
|                                                                                                                                                                                         | Wood                  | 2        | 2        | 2        | 2        |
|                                                                                                                                                                                         | Cement                | 3        | 3        | 3        | 3        |
|                                                                                                                                                                                         | Mud                   | 4        | 4        | 4        | 4        |
|                                                                                                                                                                                         | Other (Specify)       | _____    | _____    | _____    | _____    |

**Section C: Handwashing**

|                                                                                                                                                |                             |                         |                                 |                                  |                                            |
|------------------------------------------------------------------------------------------------------------------------------------------------|-----------------------------|-------------------------|---------------------------------|----------------------------------|--------------------------------------------|
| Indicate how many hand washing stations the school has for use by pupils and how many are for use exclusively by boys/exclusively girls/shared |                             |                         |                                 |                                  |                                            |
| <b>Instruction: Record total number of handwashing stations and whether for use by boys/girls/shared</b>                                       | Total Number not functional | Total Number functional | Number functional for boys only | Number functional for girls only | Number functional for boys & girls/ Shared |
| Handwashing stations                                                                                                                           | [ ____ ]                    | [ ____ ]                | [ ____ ]                        | [ ____ ]                         | [ ____ ]                                   |

**Section D: Sanitation**

|                                                     |                                                                     |            |           |
|-----------------------------------------------------|---------------------------------------------------------------------|------------|-----------|
| Indicate whether the school provides the following: |                                                                     |            |           |
|                                                     |                                                                     | <b>YES</b> | <b>NO</b> |
| <b>A</b>                                            | Does the school have any sanitary pads in stock?                    | 1          | 2         |
| <b>B</b>                                            | Is the storage area locked?                                         | 1          | 2         |
| <b>C</b>                                            | Did the school provide soap for handwashing for the students today? | 1          | 2         |

**Section E: Record Keeping & Registers**

|                                                                                                    |                                                                          |                      |                      |                      |                      |                      |                      |
|----------------------------------------------------------------------------------------------------|--------------------------------------------------------------------------|----------------------|----------------------|----------------------|----------------------|----------------------|----------------------|
| <b>Instruction: Ask to observe the school's registers for class 4 - 8. For each class, record:</b> |                                                                          |                      |                      |                      |                      |                      |                      |
|                                                                                                    |                                                                          |                      | <b>a.</b><br>Class 4 | <b>b.</b><br>Class 5 | <b>c.</b><br>Class 6 | <b>d.</b><br>Class 7 | <b>e.</b><br>Class 8 |
| <b>C1</b>                                                                                          | Is there an 'official' register or a makeshift one (e.g. exercise book)? | Official register    | 2                    | 2                    | 2                    | 2                    | 2                    |
|                                                                                                    |                                                                          | Makeshift register   | 1                    | 1                    | 1                    | 1                    | 1                    |
|                                                                                                    |                                                                          | No register          | 0                    | 0                    | 0                    | 0                    | 0                    |
| <b>C2</b>                                                                                          | Look at the past 5 school-days. Has the register been:                   | Filled in completely | 2                    | 2                    | 2                    | 2                    | 2                    |
|                                                                                                    |                                                                          | Filled in partially  | 1                    | 1                    | 1                    | 1                    | 1                    |
|                                                                                                    |                                                                          | Not filled in        | 0                    | 0                    | 0                    | 0                    | 0                    |
|                                                                                                    |                                                                          | Reg. not observed    | 99                   | 99                   | 99                   | 99                   | 99                   |
